# Supplementary material for: Seed Germination in Cistus ladanifer: Heat Shock, Physical Dormancy, Soil Temperatures and Significance to Natural Regeneration
Source: MDPI journal article supplement (doi:10.3390/plants8030063), 2019-03-12
Supplement: s1 [file s1]

**Table S3.** Weight of seeds of *Cistus ladanifer* not treated with heat before imbibition started ( $W_s$ ), of non-germinated seeds after no more germination was recorded ( $W_f$ ) and gain/loss of weight weighed by  $W_s$  ( $\Delta$ ).

| Replicate<br>and seed<br>number | $W_s$ (mg) | $W_f$ (mg) | $\Delta$ (%) | Replicate<br>and seed<br>number | $W_s$ (mg) | $W_f$ (mg) | $\Delta$ (%) | Replicate<br>and seed<br>number | $W_s$ (mg) | $W_f$ (mg) | $\Delta$ (%) | Replicate<br>and seed<br>number | $W_s$ (mg) | $W_f$ (mg) | $\Delta$ (%) |
|---------------------------------|------------|------------|--------------|---------------------------------|------------|------------|--------------|---------------------------------|------------|------------|--------------|---------------------------------|------------|------------|--------------|
| 1.1                             | 0.305      | 0.295      | -3.279       | 2.1                             | 0.264      | 0.276      | 4.545        | 3.1                             | 0.293      | a          | –            | 4.1                             | 0.250      | a          | –            |
| 1.2                             | 0.274      | 0.291      | 6.204        | 2.2                             | 0.308      | a          | –            | 3.2                             | 0.249      | 0.252      | 1.205        | 4.2                             | 0.337      | a          | –            |
| 1.3                             | 0.258      | 0.261      | 1.163        | 2.3                             | 0.220      | 0.225      | 2.273        | 3.3                             | 0.275      | 0.270      | -1.818       | 4.3                             | 0.336      | 0.361      | 7.440        |
| 1.4                             | 0.304      | a          | –            | 2.4                             | 0.320      | 0.335      | 4.688        | 3.4                             | 0.293      | 0.297      | 1.365        | 4.4                             | 0.270      | 0.277      | 2.593        |
| 1.5                             | 0.278      | 0.305      | 9.712        | 2.5                             | 0.268      | 0.281      | 4.851        | 3.5                             | 0.339      | a          | –            | 4.5                             | 0.313      | a          | –            |
| 1.6                             | 0.236      | 0.265      | 12.288       | 2.6                             | 0.278      | a          | –            | 3.6                             | 0.293      | 0.331      | 12.969       | 4.6                             | 0.281      | 0.298      | 6.050        |
| 1.7                             | 0.251      | b          | –            | 2.7                             | 0.264      | 0.272      | 3.030        | 3.7                             | 0.245      | 0.255      | 4.082        | 4.7                             | 0.284      | 0.319      | 12.324       |
| 1.8                             | 0.290      | 0.296      | 2.069        | 2.8                             | 0.305      | a          | –            | 3.8                             | 0.327      | a          | –            | 4.8                             | 0.335      | a          | –            |
| 1.9                             | 0.285      | 0.282      | -1.053       | 2.9                             | 0.274      | 0.283      | 3.285        | 3.9                             | 0.222      | 0.244      | 9.910        | 4.9                             | 0.265      | 0.268      | 1.132        |
| 1.10                            | 0.329      | 0.327      | -0.608       | 2.10                            | 0.263      | 0.265      | 0.760        | 3.10                            | 0.318      | a          | –            | 4.10                            | 0.292      | 0.305      | 4.452        |
| 1.11                            | 0.284      | 0.305      | 7.394        | 2.11                            | 0.247      | 0.253      | 2.429        | 3.11                            | 0.079      | c          | –            | 4.11                            | 0.297      | 0.310      | 4.377        |
| 1.12                            | 0.235      | 0.239      | 1.702        | 2.12                            | 0.264      | 0.263      | -0.379       | 3.12                            | 0.246      | a          | –            | 4.12                            | 0.275      | a          | –            |
| 1.13                            | 0.311      | 0.312      | 0.322        | 2.13                            | 0.296      | a          | –            | 3.13                            | 0.278      | 0.292      | 5.036        | 4.13                            | 0.289      | 0.303      | 4.844        |
| 1.14                            | 0.242      | 0.250      | 3.306        | 2.14                            | 0.276      | a          | –            | 3.14                            | 0.286      | a          | –            | 4.14                            | 0.207      | a          | –            |
| 1.15                            | 0.325      | a          | –            | 2.15                            | 0.082      | c          | –            | 3.15                            | 0.246      | 0.265      | 7.724        | 4.15                            | 0.240      | 0.230      | -4.167       |
| 1.16                            | 0.320      | a          | –            | 2.16                            | 0.274      | 0.265      | -3.285       | 3.16                            | 0.332      | 0.348      | 4.819        | 4.16                            | 0.311      | 0.331      | 6.431        |
| 1.17                            | 0.256      | 0.258      | 0.781        | 2.17                            | 0.258      | 0.282      | 9.302        | 3.17                            | 0.331      | a          | –            | 4.17                            | 0.247      | 0.260      | 5.263        |
| 1.18                            | 0.325      | a          | –            | 2.18                            | 0.279      | 0.294      | 5.376        | 3.18                            | 0.261      | a          | –            | 4.18                            | 0.271      | 0.293      | 8.118        |
| 1.19                            | 0.253      | a          | –            | 2.19                            | 0.265      | 0.278      | 4.906        | 3.19                            | 0.070      | c          | –            | 4.19                            | 0.292      | 0.306      | 4.795        |
| 1.20                            | 0.341      | 0.346      | 1.466        | 2.20                            | 0.347      | a          | –            | 3.20                            | 0.281      | 0.297      | 5.694        | 4.20                            | 0.270      | 0.262      | -2.963       |
| 1.21                            | 0.292      | 0.282      | -3.425       | 2.21                            | 0.273      | 0.283      | 3.663        | 3.21                            | 0.291      | 0.292      | 0.344        | 4.21                            | 0.221      | a          | –            |
| 1.22                            | 0.275      | 0.287      | 4.364        | 2.22                            | 0.184      | a          | –            | 3.22                            | 0.304      | a          | –            | 4.22                            | 0.268      | 0.284      | 5.970        |
| 1.23                            | 0.220      | 0.218      | -0.909       | 2.23                            | 0.293      | 0.288      | -1.706       | 3.23                            | 0.318      | 0.326      | 2.516        | 4.23                            | 0.296      | 0.305      | 3.041        |
| 1.24                            | 0.306      | a          | –            | 2.24                            | 0.311      | a          | –            | 3.24                            | 0.304      | 0.309      | 1.645        | 4.24                            | 0.255      | 0.263      | 3.137        |
| 1.25                            | 0.283      | a          | –            | 2.25                            | 0.278      | 0.292      | 5.036        | 3.25                            | 0.305      | a          | –            | 4.25                            | 0.312      | 0.328      | 5.128        |

<sup>a</sup> Germinated seed; <sup>b</sup> Lost seed; <sup>c</sup> Empty seed.
