# Supplementary material for: Seed Germination in Cistus ladanifer: Heat Shock, Physical Dormancy, Soil Temperatures and Significance to Natural Regeneration
Source: MDPI journal article supplement (doi:10.3390/plants8030063), 2019-03-12
Supplement: s1 [file s1]

**Table S2.** Mean  $\pm$  SE (sample size  $n$  inside parentheses) of final germination, and of estimated or derived parameters of Weibull equations, lag, rate, duration and shape of germination of *Cistus ladanifer* seeds incubated under constant temperature (20 °C) and photoperiod (8 h) after heat treatments (15 min.).

| Temperature of heat treatment (°C) | Final germination (%) | Lag of germination (day) | Rate of germination (day) | Duration of germination (day) | Shape of germination |
|------------------------------------|-----------------------|--------------------------|---------------------------|-------------------------------|----------------------|
| 10                                 | 31.7 $\pm$ 5.0 (4)    | 5.0 $\pm$ 0.03 (3)       | 5.8 $\pm$ 0.41 (3)        | 16.8 $\pm$ 5.2 (3)            | 2.9 $\pm$ 0.8 (3)    |
| 20                                 | 27.3 $\pm$ 2.5 (8)    | 4.7 $\pm$ 0.99 (5)       | 4.8 $\pm$ 0.55 (5)        | 15.3 $\pm$ 3.3 (5)            | 3.5 $\pm$ 1.2 (5)    |
| 30                                 | 32.6 $\pm$ 1.2 (4)    | 4.0 $\pm$ 0.99 (3)       | 5.0 $\pm$ 0.01 (3)        | 8.1 $\pm$ 0.7 (3)             | 5.4 $\pm$ 0.8 (3)    |
| 40                                 | 41.8 $\pm$ 4.4 (8)    | 2.8 $\pm$ 0.55 (4)       | 6.3 $\pm$ 0.76 (4)        | 14.2 $\pm$ 2.8 (4)            | 3.6 $\pm$ 0.8 (4)    |
| 50                                 | 34.5 $\pm$ 4.5 (4)    | 3.9 $\pm$ 0.07 (2)       | 4.9 $\pm$ 0.07 (2)        | 10.8 $\pm$ 0.5 (2)            | 3.1 $\pm$ 0.1 (2)    |
| 60                                 | 46.3 $\pm$ 8.4 (8)    | 4.0 $\pm$ 0.53 (6)       | 6.0 $\pm$ 0.49 (6)        | 14.4 $\pm$ 2.2 (6)            | 4.2 $\pm$ 1.3 (6)    |
| 70                                 | 48.4 $\pm$ 6.9 (8)    | 3.1 $\pm$ 0.59 (7)       | 7.9 $\pm$ 0.98 (7)        | 16.9 $\pm$ 2.4 (7)            | 3.5 $\pm$ 0.4 (7)    |
| 80                                 | 89.0 $\pm$ 5.5 (4)    | 2.3 $\pm$ 0.20 (4)       | 10.8 $\pm$ 1.76 (4)       | 21.0 $\pm$ 5.3 (4)            | 4.2 $\pm$ 0.7 (4)    |
| 90                                 | 100.0 $\pm$ 0 (4)     | 2.0 $\pm$ 0.03 (4)       | 7.0 $\pm$ 0.55 (4)        | 9.6 $\pm$ 0.2 (4)             | 8.4 $\pm$ 1.7 (4)    |
| 100                                | 85.8 $\pm$ 7.5 (4)    | 6.5 $\pm$ 0.87 (3)       | 6.4 $\pm$ 1.93 (3)        | 18.9 $\pm$ 2.8 (3)            | 2.2 $\pm$ 0.4 (3)    |
| 110                                | 50.9 $\pm$ 9.0 (8)    | 5.5 $\pm$ 0.89 (7)       | 6.1 $\pm$ 0.79 (7)        | 12.9 $\pm$ 1.8 (7)            | 4.1 $\pm$ 0.8 (7)    |
| 120                                | 26.3 $\pm$ 9.8 (8)    | 9.2 $\pm$ 0.91 (3)       | 4.8 $\pm$ 1.95 (3)        | 12.4 $\pm$ 2.9 (3)            | 2.8 $\pm$ 1.1 (3)    |
| 130                                | 15.5 $\pm$ 10.2 (8)   | 9.0 $\pm$ 1.02 (2)       | 5.0 $\pm$ 1.00 (2)        | 13.1 $\pm$ 0.9 (2)            | 3.5 $\pm$ 0.9 (2)    |
| 140                                | 0 $\pm$ 0 (4)         | –                        | –                         | –                             | –                    |
| 150                                | 0 $\pm$ 0 (4)         | –                        | –                         | –                             | –                    |

Differences in sample sizes between final germination and Weibull parameters result from replicates where no germination occurred or from replicates where fitting Weibull equations was not possible.
