# Supplementary material for: Seed Germination in Cistus ladanifer: Heat Shock, Physical Dormancy, Soil Temperatures and Significance to Natural Regeneration
Source: MDPI journal article supplement (doi:10.3390/plants8030063), 2019-03-12
Supplement: s1 [file s1]

**Table S1.** Mean  $\pm$  SE of final germination of *Cistus ladanifer* seeds incubated under constant and alternate temperatures (16/8 h cycles) and photoperiod (8 h) simultaneous with the highest temperature.

| Temperature of incubation (°C) | Photoperiod (h) | Final germination (%) |
|--------------------------------|-----------------|-----------------------|
| 10                             | 8               | 30.3 $\pm$ 2.1        |
| 15                             | 8               | 37.9 $\pm$ 7.6        |
| 20                             | 8               | 27.0 $\pm$ 4.1        |
| 25                             | 8               | 27.1 $\pm$ 3.6        |
| 30                             | 8               | 21.6 $\pm$ 5.0        |
| 10/20                          | 8               | 29.8 $\pm$ 2.8        |
| 15/25                          | 8               | 35.7 $\pm$ 3.3        |
| 20/30                          | 8               | 30.7 $\pm$ 3.5        |
| 20                             | 8               | 27.7 $\pm$ 3.4        |
| 20                             | 0               | 28.4 $\pm$ 1.9        |

All samples with  $n=4$ .
